# Supplementary material
Source: publisher figshare collection journal article supplement (https://acs.figshare.com/ndownloader/files/24748227)
Supplement: Supplementary file 1 [file 24748227]

## Sheet: Sheet1
Supplemental table 1: List of generated peptides after digestion by each enzyme
ERAP1	Length	ERAP2	Length	ERAP1ERAP2	Length	IRAP	Length
ALQIPFA	7	ADAGFIK	7	LNDILSR	7	ADSFVIR	7
FPREGVF	7	ADSFVIR	7	NNSIAIP	7	DGYFKIY	7
GAAAYYV	7	DGYFKIY	7	QPTESIV	7	FGAGAAL	7
GLTVLPP	7	DSFVIRG	7	TRFASVY	7	FPREGVF	7
GWTFGAG	7	FPNITNL	7	LPFFSNVT	8	GLTVLPP	7
GYHLMSF	7	FPREGVF	7	LQELGKYE	8	GVYFAST	7
IAYTMSL	7	GGVSVIT	7	SGWTFGAG	8	HLMSFPQ	7
IDGYFKI	7	GLTVLPP	7	AGFIKQYGD	9	IDGYFKI	7
KLIANQF	7	GWTFGAG	7	AGTITSGWT	9	IFGTTLD	7
LGKLQDV	7	IAGLIAI	7	DLQELGKYE	9	LPFQQFG	7
LLAGTIT	7	IDGYFKI	7	DPLQPELDS	9	LPIGINI	7
LSRLDKV	7	IGVTQNV	7	NGIGVTQNV	9	LPPLLTD	7
LTPTWRV	7	IRGWIFG	7	NQKLIANQF	9	NDPFLGV	7
MESEFRV	7	ISSVLND	7	VGYLQPRTF	9	PAQEKNF	7
NDPFLGV	7	LLALHRS	7	VLHSTQDLF	9	PFGEVFN	7
NFSQILP	7	LNDILSR	7	AIGKIQDSLS	10	PQSAPHG	7
NNSIAIP	7	LPDDFTG	7	DAGFIKQYGD	10	QPRTFLL	7
NQFNSAI	7	LPFFSNV	7	DPFLGVYYHK	10	TLEILDI	7
QALNTLV	7	LPFQQFG	7	DPQTLEILDI	10	VIAWNSN	7
QPFLMDL	7	LPIGINI	7	DRLITGRLQS	10	YLQPRTF	7
RFNGIGV	7	LPPLLTD	7	DSFVIRGDEV	10	YNYKLPD	7
RFQTLLA	7	LREFVFK	7	ENQKLIANQF	10	YNYLYRL	7
TRFASVY	7	LSRLDKV	7	IEDLLFNKVT	10	AISSVLND	8
TWFHAIH	7	LTPTWRV	7	SFELLHAPAT	10	ALDPLSET	8
YFPLQSY	7	NNSIAIP	7	TPTWRVYSTG	10	ALLAGTIT	8
YLQPRTF	7	NPVLPFN	7	FGRDIADTTDA	11	APHGVVFL	8
YTSALLA	7	QPFLMDL	7	LKYNENGTITD	11	DAGFIKQY	8
YYPDKVF	7	QPRTFLL	7	LPIGINITRFQ	11	DFGGFNFS	8
YYVGYLQ	7	QPTESIV	7	LPPLLTDEMIA	11	ELLHAPAT	8
ALGKLQDV	8	SPDVDLG	7	PPAYTNSFTRG	11	EPLVDLPI	8
ALLAGTIT	8	SQSIIAY	7	QPFLMDLEGKQ	11	ESIVRFPN	8
ANQFNSAI	8	TLEILDI	7	QPTESIVRFPN	11	EVFNATRF	8
ATRFASVY	8	TRFASVY	7	SPDVDLGDISG	11	GAGAALQI	8
DAGFIKQY	8	AISSVLND	8	TQQLIRAAEIR	11	GFQPTNGV	8
EFRVYSSA	8	ALDPLSET	8	VAKNLNESLID	11	GINITRFQ	8
ELLHAPAT	8	ALGKLQDV	8	ALGKLQDVVNQN	12	GTITSGWT	8
FEYVSQPF	8	APHGVVFL	8	DIADTTDAVRDP	12	GYLQPRTF	8
FVIRGDEV	8	DAGFIKQY	8	EVAKNLNESLID	12	LPFFSNVT	8
GTITSGWT	8	DGVYFAST	8	FPQSAPHGVVFL	12	LPFQQFGR	8
GVYYPDKV	8	DPLQPELD	8	IPFAMQMAYRFN	12	LPLVSSQC	8
GYLQPRTF	8	DYSVLYNS	8	LPFQQFGRDIAD	12	LQELGKYE	8
HFPREGVF	8	EFQFCNDP	8	LPLVSSQCVNLT	12	NIDGYFKI	8
HLMSFPQS	8	ELLHAPAT	8	LPPAYTNSFTRG	12	NITRFQTL	8
IPFAMQMA	8	EPLVDLPI	8	NKVTLADAGFIK	12	NKKFLPFQ	8
KFLPFQQF	8	EVFNATRF	8	NRALTGIAVEQD	12	NPVLPFND	8
LPFFSNVT	8	FKEELDKY	8	NSAIGKIQDSLS	12	NYNYLYRL	8
LPFQQFGR	8	GFIKQYGD	8	TPINLVRDLPQG	12	PGQTGKIA	8
LPQGFSAL	8	GIGVTQNV	8	TRTQLPPAYTNS	12	PLQPELDS	8
LYENQKLI	8	GINITRFQ	8	VPAQEKNFTTAP	12	QLTPTWRV	8
NFNFNGLT	8	GTITSGWT	8	APGQTGKIADYNY	13	SKTQSLLI	8
NFYEPQII	8	IEDLLFNK	8	DLQELGKYEQYIK	13	SLQTYVTQ	8
NGLTVLPP	8	ILSRLDKV	8	DPLQPELDSFKEE	13	SNFGAISS	8
NIDGYFKI	8	IPIGAGIC	8	DTTDAVRDPQTLE	13	TPINLVRD	8
NKCVNFNF	8	LHSTQDLF	8	GVVFLHVTYVPAQ	13	TTDNTFVS	8
NLREFVFK	8	LIRAAEIR	8	IGKIQDSLSSTAS	13	VLNDILSR	8
NYKLPDDF	8	LPFFSNVT	8	NDGVYFASTEKSN	13	VVNIQKEI	8
QKEIDRLN	8	LPFQQFGR	8	NGIGVTQNVLYEN	13	WFHAIHVS	8
QKLIANQF	8	LPLVSSQC	8	SFGGVSVITPGTN	13	YADSFVIR	8
QLTPTWRV	8	LPQGFSAL	8	TGTGVLTESNKKF	13	YGVSPTKL	8
QYTSALLA	8	LQELGKYE	8	TPGTNTSNQVAVL	13	YNYKLPDD	8
SKTQSLLI	8	LYENQKLI	8	TPPIKDFGGFNFS	13	AGAALQIPF	9
SLLIVNNA	8	NGLTVLPP	8	TVEKGIYQTSNFR	13	AGTITSGWT	9
SLQTYVTQ	8	NKKFLPFQ	8	VSSQCVNLTTRTQ	13	ALNTLVKQL	9
SQPFLMDL	8	PGQTGKIA	8	AIGKIQDSLSSTAS	14	AYRFNGIGV	9
THWFVTQR	8	PVSMTKTS	8	DLEGKQGNFKNLRE	14	DAGFIKQYG	9
TVYDPLQP	8	QKLIANQF	8	EIDRLNEVAKNLNE	14	DLQELGKYE	9
VGYQPYRV	8	QLTPTWRV	8	FPLQSYGFQPTNGV	14	DPFLGVYYH	9
VLSFELLH	8	SGWTFGAG	8	GGFNFSQILPDPSK	14	DQLTPTWRV	9
VTQQLIRA	8	SPDVDLGD	8	IQDSLSSTASALGK	14	EFVFKNIDG	9
VVNIQKEI	8	TFKCYGVS	8	IRGDEVRQIAPGQT	14	FELLHAPAT	9
VYYPDKVF	8	TLLALHRS	8	NIQKEIDRLNEVAK	14	FLLKYNENG	9
WFHAIHVS	8	TPCSFGGV	8	NNTVYDPLQPELDS	14	FNGLTGTGV	9
WMESEFRV	8	TPINLVRD	8	QPTNGVGYQPYRVV	14	FNSAIGKIQ	9
YADSFVIR	8	TPTWRVYS	8	SLGAENSVAYSNNS	14	FVTQRNFYE	9
YGVSPTKL	8	TRFQTLLA	8	TPGDSSSGWTAGAA	14	GEVFNATRF	9
YRFNGIGV	8	VLNDILSR	8	TPTWRVYSTGSNVF	14	GFNFSQILP	9
AGTITSGWT	9	VQPTESIV	8	YPDKVFRSSVLHST	14	GFSALEPLV	9
AQYTSALLA	9	YADSFVIR	8			GGNYNYLYR	9
AYRFNGIGV	9	YRFNGIGV	8			GNYNYLYRL	9
DAGFIKQYG	9	AGFIKQYGD	9			GTHWFVTQR	9
DILSRLDKV	9	AGTITSGWT	9			GVYYPDKVF	9
DLPQGFSAL	9	DAGFIKQYG	9			HADQLTPTW	9
DQLTPTWRV	9	DILSRLDKV	9			HLMSFPQSA	9
DSKTQSLLI	9	DLQELGKYE	9			LNDILSRLD	9
EDLLFNKVT	9	DPFLGVYYH	9			LNTLVKQLS	9
FELLHAPAT	9	DPLQPELDS	9			LPFQQFGRD	9
FLPFQQFGR	9	DQLTPTWRV	9			LPIGINITR	9
FNGLTGTGV	9	DVVIGIVNN	9			LPPAYTNSF	9
FNGLTVLPP	9	FELLHAPAT	9			NATRFASVY	9
FNKVTLADA	9	FNGLTGTGV	9			NGIGVTQNV	9
FNSAIGKIQ	9	FNGLTVLPP	9			PDKVFRSSV	9
FVTQRNFYE	9	FNSAIGKIQ	9			PFNDGVYFA	9
GAALQIPFA	9	GAALQIPFA	9			PTWRVYSTG	9
GEVFNATRF	9	GAISSVLND	9			QLIRAAEIR	9
GINASVVNI	9	GNYNYLYRL	9			QPRTFLLKY	9
GRLQSLQTY	9	GRLQSLQTY	9			SEFRVYSSA	9
GTHWFVTQR	9	GTHWFVTQR	9			SFELLHAPA	9
GVYYPDKVF	9	IGKIQDSLS	9			SFGGVSVIT	9
HLMSFPQSA	9	IRGWIFGTT	9			SLQTYVTQQ	9
HTPINLVRD	9	IVNNATNVV	9			SNKKFLPFQ	9
IANQFNSAI	9	LGAENSVAY	9			SSNFGAISS	9
IVNNATNVV	9	LGKYEQYIK	9			TESIVRFPN	9
KFLPFQQFG	9	LHVTYVPAQ	9			TGKIADYNY	9
KNIDGYFKI	9	LPFQQFGRD	9			TLADAGFIK	9
KNLREFVFK	9	LPPAYTNSF	9			TPGTNTSNQ	9
LDSKTQSLL	9	LPPLLTDEM	9			TPPIKDFGG	9
LEPLVDLPI	9	NATRFASVY	9			TSGWTFGAG	9
LNTLVKQLS	9	NGIGVTQNV	9			TVLPPLLTD	9
LPFQQFGRD	9	NQKLIANQF	9			VEAEVQIDR	9
NAQALNTLV	9	NTVYDPLQP	9			VGYLQPRTF	9
NATRFASVY	9	PTWRVYSTG	9			VLHSTQDLF	9
NGIGVTQNV	9	QLIRAAEIR	9			VLYENQKLI	9
NQKLIANQF	9	QPRTFLLKY	9			VQIDRLITG	9
NTSNQVAVL	9	QRNFYEPQI	9			YNYKLPDDF	9
NTVYDPLQP	9	SALGKLQDV	9			YVTQQLIRA	9
NVLYENQKL	9	SASFSTFKC	9			AGAALQIPFA	10
PDKVFRSSV	9	SEFRVYSSA	9			ALTGIAVEQD	10
QIPFAMQMA	9	SQILPDPSK	9			ASALGKLQDV	10
QLPPAYTNS	9	TAGAAAYYV	9			DAGFIKQYGD	10
QPRTFLLKY	9	TFEYVSQPF	9			DAVRDPQTLE	10
QSLLIVNNA	9	TPINLVRDL	9			DGYFKIYSKH	10
QVAVLYQDV	9	TPPIKDFGG	9			DPFLGVYYHK	10
RNFYEPQII	9	TSGWTFGAG	9			DRLITGRLQS	10
RVQPTESIV	9	TTEILPVSM	9			DSFVIRGDEV	10
SALGKLQDV	9	VGYLQPRTF	9			EELDKYFKNH	10
SEFRVYSSA	9	VKQLSSNFG	9			ELGKYEQYIK	10
SFGGVSVIT	9	VLHSTQDLF	9			FAQVKQIYKT	10
SFVIRGDEV	9	VLYENQKLI	9			FLHVTYVPAQ	10
SIAIPTNFT	9	YKLPDDFTG	9			FNGIGVTQNV	10
SIIAYTMSL	9	YVTQQLIRA	9			FPLQSYGFQP	10
SLQTYVTQQ	9	ADQLTPTWRV	10			FPREGVFVSN	10
SSNFGAISS	9	AGAALQIPFA	10			FTVEKGIYQT	10
STFKCYGVS	9	AIGKIQDSLS	10			GGNYNYLYRL	10
SVLNDILSR	9	AKNLNESLID	10			GVGYQPYRVV	10
SVVNIQKEI	9	ALNTLVKQLS	10			IADYNYKLPD	10
SWMESEFRV	9	ASALGKLQDV	10			IEDLLFNKVT	10
TAGAAAYYV	9	DAGFIKQYGD	10			LADAGFIKQY	10
TFEYVSQPF	9	DAVRDPQTLE	10			NFNGLTGTGV	10
TLADAGFIK	9	DEVRQIAPGQ	10			NIQKEIDRLN	10
TPINLVRDL	9	DGYFKIYSKH	10			NITRFQTLLA	10
TPPIKDFGG	9	DITPCSFGGV	10			NVYADSFVIR	10
TTEILPVSM	9	DPFLGVYYHK	10			PFGEVFNATR	10
TVLPPLLTD	9	DPLQPELDSF	10			PIGINITRFQ	10
TWFHAIHVS	9	DPLSETKCTL	10			PINLVRDLPQ	10
VGYLQPRTF	9	DPQTLEILDI	10			PTESIVRFPN	10
VGYQPYRVV	9	DRLITGRLQS	10			QFNSAIGKIQ	10
VIKVCEFQF	9	DSFVIRGDEV	10			QLIRAAEIRA	10
VLHSTQDLF	9	DVNCTEVPVA	10			QLNRALTGIA	10
VLYENQKLI	9	EELDKYFKNH	10			QPTNGVGYQP	10
VQIDRLITG	9	ELGKYEQYIK	10			QQLIRAAEIR	10
VRFPNITNL	9	ENQKLIANQF	10			QRNFYEPQII	10
VTQQLIRAA	9	ESEFRVYSSA	10			QSAPHGVVFL	10
VYADSFVIR	9	EVQIDRLITG	10			SFELLHAPAT	10
YHLMSFPQS	9	FGAISSVLND	10			SVLHSTQDLF	10
YVTQQLIRA	9	FGGVSVITPG	10			TDAVRDPQTL	10
AGAALQIPFA	10	FGRDIADTTD	10			TESNKKFLPF	10
AIGKIQDSLS	10	FKNIDGYFKI	10			TEVPVAIHAD	10
ALNTLVKQLS	10	FLHVTYVPAQ	10			TGRLQSLQTY	10
ALTGIAVEQD	10	FNGIGVTQNV	10			TLDSKTQSLL	10
DAGFIKQYGD	10	FPLQSYGFQP	10			TPTWRVYSTG	10
DAVRDPQTLE	10	FRVQPTESIV	10			TQEVFAQVKQ	10
DGYFKIYSKH	10	GGNYNYLYRL	10			TYVTQQLIRA	10
DITPCSFGGV	10	GINITRFQTL	10			VADYSVLYNS	10
DPFLGVYYHK	10	GVLTESNKKF	10			VTLADAGFIK	10
DPLSETKCTL	10	IDLQELGKYE	10			WTFGAGAALQ	10
DPQTLEILDI	10	IEDLLFNKVT	10			YNYKLPDDFT	10
DRLITGRLQS	10	IGIVNNTVYD	10			YPDKVFRSSV	10
DSFKEELDKY	10	IKQYGDCLGD	10			YVGYLQPRTF	10
DSFVIRGDEV	10	IPTNFTISVT	10			ADAGFIKQYGD	11
DVNCTEVPVA	10	IRGDEVRQIA	10			AEVQIDRLITG	11
EELDKYFKNH	10	ITSGWTFGAG	10			AGAALQIPFAM	11
ENQKLIANQF	10	LIVNNATNVV	10			DEVRQIAPGQT	11
ESNKKFLPFQ	10	LPFQQFGRDI	10			DKVEAEVQIDR	11
EVQIDRLITG	10	LPIGINITRF	10			DSKVGGNYNYL	11
FLHVTYVPAQ	10	LREFVFKNID	10			FGRDIADTTDA	11
FPLQSYGFQP	10	NDILSRLDKV	10			FIEDLLFNKVT	11
FTVEKGIYQT	10	NFNGLTGTGV	10			FLHVTYVPAQE	11
GYHLMSFPQS	10	NGIGVTQNVL	10			FNFNGLTGTGV	11
IDLQELGKYE	10	NGTHWFVTQR	10			FPREGVFVSNG	11
IEDLLFNKVT	10	NIQKEIDRLN	10			FYEPQIITTDN	11
ILPVSMTKTS	10	NNTVYDPLQP	10			GKQGNFKNLRE	11
IPTNFTISVT	10	NRALTGIAVE	10			GQTGKIADYNY	11
KAHFPREGVF	10	NVLYENQKLI	10			GVGYQPYRVVV	11
KFLPFQQFGR	10	PIGINITRFQ	10			GVLTESNKKFL	11
KFNGLTVLPP	10	PTESIVRFPN	10			HADQLTPTWRV	11
KHTPINLVRD	10	QPELDSFKEE	10			HLMSFPQSAPH	11
LFNKVTLADA	10	QPFLMDLEGK	10			IDRLITGRLQS	11
LSSNFGAISS	10	QPTNGVGYQP	10			IFGTTLDSKTQ	11
MSFPQSAPHG	10	QPYRVVVLSF	10			IRGWIFGTTLD	11
NESLIDLQEL	10	QQLIRAAEIR	10			ITGRLQSLQTY	11
NFNGLTGTGV	10	QRNFYEPQII	10			KVTLADAGFIK	11
NGTHWFVTQR	10	RGWIFGTTLD	10			LKYNENGTITD	11
NIQKEIDRLN	10	SFELLHAPAT	10			LMSFPQSAPHG	11
NITRFQTLLA	10	SLGAENSVAY	10			LPFQQFGRDIA	11
NSIAIPTNFT	10	SPDVDLGDIS	10			LPIGINITRFQ	11
NVYADSFVIR	10	SRLDKVEAEV	10			LSFELLHAPAT	11
PTESIVRFPN	10	SSVLNDILSR	10			LTDEMIAQYTS	11
QFNSAIGKIQ	10	TDEMIAQYTS	10			MDLEGKQGNFK	11
QPTNGVGYQP	10	TGRLQSLQTY	10			NASVVNIQKEI	11
QPYRVVVLSF	10	TPTWRVYSTG	10			NDPFLGVYYHK	11
QQLIRAAEIR	10	TSALLAGTIT	10			NFGAISSVLND	11
RDLPQGFSAL	10	TYVTQQLIRA	10			NFRVQPTESIV	11
REFVFKNIDG	10	YPDKVFRSSV	10			NLTTRTQLPPA	11
RFASVYAWNR	10	YVGYLQPRTF	10			NNSIAIPTNFT	11
RFDNPVLPFN	10	DIADTTDAVRD	11			NPVLPFNDGVY	11
RGWIFGTTLD	10	DKVEAEVQIDR	11			NQFNSAIGKIQ	11
SRLDKVEAEV	10	DLCFTNVYADS	11			NTLVKQLSSNF	11
SSVLNDILSR	10	DLGDISGINAS	11			NVTWFHAIHVS	11
SVASQSIIAY	10	DPLQPELDSFK	11			PFGEVFNATRF	11
SVLHSTQDLF	10	EKGIYQTSNFR	11			PIKDFGGFNFS	11
SVLYNSASFS	10	ERDISTEIYQA	11			PLVSSQCVNLT	11
TEVPVAIHAD	10	FGRDIADTTDA	11			PPAYTNSFTRG	11
TFLLKYNENG	10	FIEDLLFNKVT	11			PQSAPHGVVFL	11
TLADAGFIKQ	10	FKCYGVSPTKL	11			PSKPSKRSFIE	11
TPTWRVYSTG	10	FPREGVFVSNG	11			PVAIHADQLTP	11
TQEVFAQVKQ	10	FQPTNGVGYQP	11			QKFNGLTVLPP	11
TQLPPAYTNS	10	FRVYSSANNCT	11			QLSSNFGAISS	11
TQSLLIVNNA	10	GAGAALQIPFA	11			QPTESIVRFPN	11
TSALLAGTIT	10	GGVSVITPGTN	11			QTYVTQQLIRA	11
TYVPAQEKNF	10	HADQLTPTWRV	11			SFTVEKGIYQT	11
TYVTQQLIRA	10	IADTTDAVRDP	11			SNGTHWFVTQR	11
VADYSVLYNS	10	IDGYFKIYSKH	11			SSVLHSTQDLF	11
VTLADAGFIK	10	IDRLITGRLQS	11			STEKSNIIRGW	11
WFVTQRNFYE	10	IGVTQNVLYEN	11			STGSNVFQTRA	11
YPDKVFRSSV	10	IRGWIFGTTLD	11			SVLHSTQDLFL	11
ADAGFIKQYGD	11	ISSVLNDILSR	11			TESNKKFLPFQ	11
DAVRDPQTLEI	11	ITGRLQSLQTY	11			TLADAGFIKQY	11
DEVRQIAPGQT	11	LGKLQDVVNQN	11			TLDSKTQSLLI	11
DIADTTDAVRD	11	LIDLQELGKYE	11			TLVKQLSSNFG	11
EILPVSMTKTS	11	LKPFERDISTE	11			TNVYADSFVIR	11
EIRASANLAAT	11	LKYNENGTITD	11			TPTWRVYSTGS	11
EKGIYQTSNFR	11	LNDILSRLDKV	11			TQLNRALTGIA	11
FPREGVFVSNG	11	LPDDFTGCVIA	11			TQQLIRAAEIR	11
FRVYSSANNCT	11	LPFQQFGRDIA	11			TRGVYYPDKVF	11
GGVSVITPGTN	11	LPIGINITRFQ	11			VAKNLNESLID	11
GLTVLPPLLTD	11	LPPLLTDEMIA	11			VGGNYNYLYRL	11
IADTTDAVRDP	11	LREFVFKNIDG	11			VNIQKEIDRLN	11
IDRLITGRLQS	11	LTPTWRVYSTG	11			VTLADAGFIKQ	11
IFGTTLDSKTQ	11	NASVVNIQKEI	11			VTYVPAQEKNF	11
IGVTQNVLYEN	11	NFSQILPDPSK	11			YENQKLIANQF	11
ISSVLNDILSR	11	NGIGVTQNVLY	11			YRLFRKSNLKP	11
KEELDKYFKNH	11	NGVGYQPYRVV	11			YTSALLAGTIT	11
KIADYNYKLPD	11	NHTSPDVDLGD	11			YYPDKVFRSSV	11
KKFLPFQQFGR	11	NKSWMESEFRV	11			ADAGFIKQYGDC	12
KRFDNPVLPFN	11	NLTTRTQLPPA	11			AEIRASANLAAT	12
KVTLADAGFIK	11	NNSIAIPTNFT	11			AISSVLNDILSR	12
LDPLSETKCTL	11	NNSYECDIPIG	11			ALLAGTITSGWT	12
LGKLQDVVNQN	11	NPVLPFNDGVY	11			ANQFNSAIGKIQ	12
LKYNENGTITD	11	NQFNSAIGKIQ	11			AQKFNGLTVLPP	12
LPIGINITRFQ	11	PPAYTNSFTRG	11			ARSVASQSIIAY	12
LPPLLTDEMIA	11	PSKPSKRSFIE	11			AYYVGYLQPRTF	12
NDPFLGVYYHK	11	QELGKYEQYIK	11			DAGFIKQYGDCL	12
NFGAISSVLND	11	QKFNGLTVLPP	11			DGVYFASTEKSN	12
NLTTRTQLPPA	11	QNVLYENQKLI	11			DIADTTDAVRDP	12
NPVLPFNDGVY	11	QPFLMDLEGKQ	11			DKVFRSSVLHST	12
NQFNSAIGKIQ	11	QPRTFLLKYNE	11			DLLFNKVTLADA	12
QDVNCTEVPVA	11	QPTESIVRFPN	11			DLPIGINITRFQ	12
QDVVNQNAQAL	11	SFTVEKGIYQT	11			DNPVLPFNDGVY	12
QLSSNFGAISS	11	SNGTHWFVTQR	11			EGKQGNFKNLRE	12
QPFLMDLEGKQ	11	SNQVAVLYQDV	11			EGVFVSNGTHWF	12
QPRTFLLKYNE	11	SPDVDLGDISG	11			ELLHAPATVCGP	12
QPTESIVRFPN	11	SQSIIAYTMSL	11			ESIVRFPNITNL	12
QQFGRDIADTT	11	STEKSNIIRGW	11			EVAKNLNESLID	12
RALTGIAVEQD	11	SVTTEILPVSM	11			EVFAQVKQIYKT	12
RTQLPPAYTNS	11	TESNKKFLPFQ	11			EVFNATRFASVY	12
SVTTEILPVSM	11	TGVLTESNKKF	11			FDEDDSEPVLKG	12
TESNKKFLPFQ	11	TLDSKTQSLLI	11			FLHVTYVPAQEK	12
TITSGWTFGAG	11	TLEILDITPCS	11			FPQSAPHGVVFL	12
TLVKQLSSNFG	11	TLVKQLSSNFG	11			FRKSNLKPFERD	12
TNVYADSFVIR	11	TNVYADSFVIR	11			FTNVYADSFVIR	12
TPINLVRDLPQ	11	TPINLVRDLPQ	11			FVIRGDEVRQIA	12
TQQLIRAAEIR	11	TQQLIRAAEIR	11			FVTQRNFYEPQI	12
VAKNLNESLID	11	TRFASVYAWNR	11			GFQPTNGVGYQP	12
VFLHVTYVPAQ	11	TRGVYYPDKVF	11			GINITRFQTLLA	12
VIAWNSNNLDS	11	VAKNLNESLID	11			GTITSGWTFGAG	12
VIRGDEVRQIA	11	VFKNIDGYFKI	11			GVGYQPYRVVVL	12
VKQIYKTPPIK	11	VGGNYNYLYRL	11			HLMSFPQSAPHG	12
VNIQKEIDRLN	11	VIGIVNNTVYD	11			HVTYVPAQEKNF	12
VTYVPAQEKNF	11	VIRGDEVRQIA	11			INASVVNIQKEI	12
YKTPPIKDFGG	11	VNIQKEIDRLN	11			IPFAMQMAYRFN	12
YNYKLPDDFTG	11	VRDLPQGFSAL	11			IYQTSNFRVQPT	12
AISSVLNDILSR	12	VRDPQTLEILD	11			KVGGNYNYLYRL	12
ALGKLQDVVNQN	12	VYDPLQPELDS	11			LLTDEMIAQYTS	12
DIADTTDAVRDP	12	YRLFRKSNLKP	11			LPFQQFGRDIAD	12
DISGINASVVNI	12	ALDPLSETKCTL	12			LPIGINITRFQT	12
DLLFNKVTLADA	12	ALGKLQDVVNQN	12			LPLVSSQCVNLT	12
DNPVLPFNDGVY	12	ANQFNSAIGKIQ	12			LPPAYTNSFTRG	12
DYNYKLPDDFTG	12	APATVCGPKKST	12			LPQGFSALEPLV	12
DYSVLYNSASFS	12	APHGVVFLHVTY	12			LQELGKYEQYIK	12
EAEVQIDRLITG	12	AQALNTLVKQLS	12			LTESNKKFLPFQ	12
EFRVYSSANNCT	12	ARSVASQSIIAY	12			NFNFNGLTGTGV	12
EGKQGNFKNLRE	12	AYYVGYLQPRTF	12			NIDGYFKIYSKH	12
EVAKNLNESLID	12	DAGFIKQYGDCL	12			NKVTLADAGFIK	12
FPQSAPHGVVFL	12	DGKAHFPREGVF	12			NLREFVFKNIDG	12
FRKSNLKPFERD	12	DGVYFASTEKSN	12			NSAIGKIQDSLS	12
FVIRGDEVRQIA	12	DIADTTDAVRDP	12			NTLVKQLSSNFG	12
GFQPTNGVGYQP	12	DISGINASVVNI	12			PGQTGKIADYNY	12
GINASVVNIQKE	12	DKVFRSSVLHST	12			PIGINITRFQTL	12
GKIADYNYKLPD	12	DLEGKQGNFKNL	12			PINLVRDLPQGF	12
HFPREGVFVSNG	12	DLLFNKVTLADA	12			PLQPELDSFKEE	12
HLMSFPQSAPHG	12	DLPIGINITRFQ	12			QIDRLITGRLQS	12
HVTYVPAQEKNF	12	DPLSETKCTLKS	12			QLTPTWRVYSTG	12
IAWNSNNLDSKV	12	DRLNEVAKNLNE	12			QNVLYENQKLIA	12
IHADQLTPTWRV	12	DVNCTEVPVAIH	12			RSSVLHSTQDLF	12
IIAYTMSLGAEN	12	DYNYKLPDDFTG	12			SGWTFGAGAALQ	12
IPFAMQMAYRFN	12	DYSVLYNSASFS	12			SKTQSLLIVNNA	12
IYKTPPIKDFGG	12	EAEVQIDRLITG	12			SLLIVNNATNVV	12
KQLSSNFGAISS	12	EFRVYSSANNCT	12			SNFRVQPTESIV	12
LIRAAEIRASAN	12	EGKQGNFKNLRE	12			SNVTWFHAIHVS	12
LLKYNENGTITD	12	EKSNIIRGWIFG	12			STASALGKLQDV	12
LPFQQFGRDIAD	12	ELDSFKEELDKY	12			SVAYSNNSIAIP	12
LPLVSSQCVNLT	12	ELLHAPATVCGP	12			TDAVRDPQTLEI	12
LPPAYTNSFTRG	12	ENQKLIANQFNS	12			TESNKKFLPFQQ	12
LQDVVNQNAQAL	12	EVAKNLNESLID	12			TLDSKTQSLLIV	12
NFYEPQIITTDN	12	EVFAQVKQIYKT	12			TMSLGAENSVAY	12
NGLTGTGVLTES	12	EVFNATRFASVY	12			TNGVGYQPYRVV	12
NKKFLPFQQFGR	12	FDEDDSEPVLKG	12			TPINLVRDLPQG	12
NKVTLADAGFIK	12	FGAGAALQIPFA	12			TPTWRVYSTGSN	12
NLDSKVGGNYNY	12	FGGVSVITPGTN	12			TQNVLYENQKLI	12
NLKPFERDISTE	12	FKEELDKYFKNH	12			TRFQTLLALHRS	12
NRALTGIAVEQD	12	FKNHTSPDVDLG	12			TTLDSKTQSLLI	12
NSAIGKIQDSLS	12	FNFSQILPDPSK	12			VDFCGKGYHLMS	12
PFQQFGRDIADT	12	FPQSAPHGVVFL	12			VEQDKNTQEVFA	12
QIYKTPPIKDFG	12	FRKSNLKPFERD	12			VIAWNSNNLDSK	12
QVKQIYKTPPIK	12	FVIRGDEVRQIA	12			VLHSTQDLFLPF	12
RDIADTTDAVRD	12	GDEVRQIAPGQT	12			VLSFELLHAPAT	12
SNFGAISSVLND	12	GDSTECSNLLLQ	12			VNLTTRTQLPPA	12
SQPFLMDLEGKQ	12	GFQPTNGVGYQP	12			VPAQEKNFTTAP	12
TEILPVSMTKTS	12	GINITRFQTLLA	12			VQPTESIVRFPN	12
TKRFDNPVLPFN	12	GKGYHLMSFPQS	12			VSNGTHWFVTQR	12
TMSLGAENSVAY	12	GTNGTKRFDNPV	12			VTQQLIRAAEIR	12
TPCSFGGVSVIT	12	IEDLLFNKVTLA	12			VTQRNFYEPQII	12
TPINLVRDLPQG	12	IHADQLTPTWRV	12			VVFLHVTYVPAQ	12
TRTQLPPAYTNS	12	ILDITPCSFGGV	12			VYYPDKVFRSSV	12
TTDAVRDPQTLE	12	INASVVNIQKEI	12			WFHAIHVSGTNG	12
TVYDPLQPELDS	12	IPFAMQMAYRFN	12			WIFGTTLDSKTQ	12
VEKGIYQTSNFR	12	IRASANLAATKM	12			WNSNNLDSKVGG	12
VIAWNSNNLDSK	12	KPFERDISTEIY	12			YADSFVIRGDEV	12
VLPPLLTDEMIA	12	LADAGFIKQYGD	12			YGVSPTKLNDLC	12
VPAQEKNFTTAP	12	LGKLQDVVNQNA	12			YRFNGIGVTQNV	12
VPVAIHADQLTP	12	LPFNDGVYFAST	12			YSKHTPINLVRD	12
VQPTESIVRFPN	12	LPFQQFGRDIAD	12			YSSANNCTFEYV	12
VTQQLIRAAEIR	12	LPLVSSQCVNLT	12			YSTGSNVFQTRA	12
VVFLHVTYVPAQ	12	LPPAYTNSFTRG	12			ADAGFIKQYGDCL	13
VVNIQKEIDRLN	12	LPQGFSALEPLV	12			AGTITSGWTFGAG	13
WIFGTTLDSKTQ	12	LQDVVNQNAQAL	12			ALHRSYLTPGDSS	13
WNSNNLDSKVGG	12	LQELGKYEQYIK	12			APGQTGKIADYNY	13
YLTPGDSSSGWT	12	LTESNKKFLPFQ	12			AQVKQIYKTPPIK	13
AAEIRASANLAAT	13	NGLTGTGVLTES	12			AQYTSALLAGTIT	13
AHFPREGVFVSNG	13	NGLTVLPPLLTD	12			AVRDPQTLEILDI	13
APGQTGKIADYNY	13	NIDGYFKIYSKH	12			AWNSNNLDSKVGG	13
AQVKQIYKTPPIK	13	NKCVNFNFNGLT	12			DISTEIYQAGSTP	13
AWNSNNLDSKVGG	13	NKKFLPFQQFGR	12			DKNTQEVFAQVKQ	13
DISTEIYQAGSTP	13	NKVTLADAGFIK	12			DPLQPELDSFKEE	13
DKNTQEVFAQVKQ	13	NLDSKVGGNYNY	12			DSKVGGNYNYLYR	13
DLQELGKYEQYIK	13	NLKPFERDISTE	12			DTTDAVRDPQTLE	13
DQLTPTWRVYSTG	13	NRALTGIAVEQD	12			EDLLFNKVTLADA	13
DTTDAVRDPQTLE	13	NSAIGKIQDSLS	12			EILPVSMTKTSVD	13
EDLLFNKVTLADA	13	PGQTGKIADYNY	12			FDNPVLPFNDGVY	13
EPQIITTDNTFVS	13	QFGRDIADTTDA	12			FELLHAPATVCGP	13
ESLIDLQELGKYE	13	QIDRLITGRLQS	12			FGTTLDSKTQSLL	13
EVPVAIHADQLTP	13	QKLIANQFNSAI	12			FLLKYNENGTITD	13
FNGLTGTGVLTES	13	SGWTAGAAAYYV	12			FLMDLEGKQGNFK	13
FNSAIGKIQDSLS	13	SGWTFGAGAALQ	12			FNKVTLADAGFIK	13
GAALQIPFAMQMA	13	SKTQSLLIVNNA	12			FNSAIGKIQDSLS	13
GFNFSQILPDPSK	13	SLLIVNNATNVV	12			FPREGVFVSNGTH	13
GIVNNTVYDPLQP	13	SNFRVQPTESIV	12			FQTRAGCLIGAEH	13
GIYQTSNFRVQPT	13	SNNSIAIPTNFT	12			FRSSVLHSTQDLF	13
GTKRFDNPVLPFN	13	STASALGKLQDV	12			FVSNGTHWFVTQR	13
GVVFLHVTYVPAQ	13	SVAYSNNSIAIP	12			FVTQRNFYEPQII	13
GWIFGTTLDSKTQ	13	TEILPVSMTKTS	12			GEVFNATRFASVY	13
HTPINLVRDLPQG	13	TKRFDNPVLPFN	12			GFNFSQILPDPSK	13
IGAEHVNNSYECD	13	TKTSVDCTMYIC	12			GINASVVNIQKEI	13
IGKIQDSLSSTAS	13	TLLALHRSYLTP	12			GIYQTSNFRVQPT	13
IQKEIDRLNEVAK	13	TPCSFGGVSVIT	12			GNYNYLYRLFRKS	13
KFDEDDSEPVLKG	13	TPGDSSSGWTAG	12			GTKRFDNPVLPFN	13
KLQDVVNQNAQAL	13	TPINLVRDLPQG	12			GTTLDSKTQSLLI	13
LGAENSVAYSNNS	13	TPTWRVYSTGSN	12			GVVFLHVTYVPAQ	13
LHVTYVPAQEKNF	13	TQNVLYENQKLI	12			GVYYPDKVFRSSV	13
LNRALTGIAVEQD	13	TRFQTLLALHRS	12			GWIFGTTLDSKTQ	13
LPVSMTKTSVDCT	13	TRTQLPPAYTNS	12			HADQLTPTWRVYS	13
NEVAKNLNESLID	13	TSNQVAVLYQDV	12			HTPINLVRDLPQG	13
NGIGVTQNVLYEN	13	TTDNTFVSGNCD	12			HTSPDVDLGDISG	13
NLAATKMSECVLG	13	TVYDPLQPELDS	12			IADTTDAVRDPQT	13
PLLTDEMIAQYTS	13	VAVLYQDVNCTE	12			IANQFNSAIGKIQ	13
PLVSSQCVNLTTR	13	VEKGIYQTSNFR	12			IDRLNEVAKNLNE	13
PTWRVYSTGSNVF	13	VEQDKNTQEVFA	12			IGKIQDSLSSTAS	13
QDSLSSTASALGK	13	VNLTTRTQLPPA	12			IYSKHTPINLVRD	13
QIYKTPPIKDFGG	13	VPAQEKNFTTAP	12			KFDEDDSEPVLKG	13
QLIRAAEIRASAN	13	VPVAIHADQLTP	12			KLQDVVNQNAQAL	13
QPRTFLLKYNENG	13	VQPTESIVRFPN	12			KNLNESLIDLQEL	13
QQFGRDIADTTDA	13	VRDPQTLEILDI	12			KNNKSWMESEFRV	13
RDIADTTDAVRDP	13	VTQQLIRAAEIR	12			LFRKSNLKPFERD	13
RNFYEPQIITTDN	13	VVFLHVTYVPAQ	12			LHVTYVPAQEKNF	13
RVQPTESIVRFPN	13	VVNIQKEIDRLN	12			LLPLVSSQCVNLT	13
SALGKLQDVVNQN	13	WFHAIHVSGTNG	12			LNRALTGIAVEQD	13
SEFRVYSSANNCT	13	WNSNNLDSKVGG	12			LTGIAVEQDKNTQ	13
SFGGVSVITPGTN	13	YGVSPTKLNDLC	12			NGIGVTQNVLYEN	13
SIIAYTMSLGAEN	13	YQDVNCTEVPVA	12			NIIRGWIFGTTLD	13
SNLKPFERDISTE	13	YRFNGIGVTQNV	12			NLAATKMSECVLG	13
SPTKLNDLCFTNV	13	YSTGSNVFQTRA	12			NLVRDLPQGFSAL	13
SVVNIQKEIDRLN	13	AGFIKQYGDCLGD	13			NNATNVVIKVCEF	13
SYLTPGDSSSGWT	13	AGSTPCNGVEGFN	13			NNLDSKVGGNYNY	13
TAGAAAYYVGYLQ	13	AGTITSGWTFGAG	13			NQKLIANQFNSAI	13
TGKIADYNYKLPD	13	APGQTGKIADYNY	13			NTVYDPLQPELDS	13
TGTGVLTESNKKF	13	AQVKQIYKTPPIK	13			PAICHDGKAHFPR	13
TLADAGFIKQYGD	13	AVEQDKNTQEVFA	13			PDKVFRSSVLHST	13
TPGTNTSNQVAVL	13	AWNSNNLDSKVGG	13			PFLGVYYHKNNKS	13
TPPIKDFGGFNFS	13	DAVDCALDPLSET	13			PLLTDEMIAQYTS	13
TTEILPVSMTKTS	13	DAVRDPQTLEILD	13			PLVSSQCVNLTTR	13
TTRTQLPPAYTNS	13	DEMIAQYTSALLA	13			PQGFSALEPLVDL	13
TVEKGIYQTSNFR	13	DIPIGAGICASYQ	13			PQTLEILDITPCS	13
TWFHAIHVSGTNG	13	DISTEIYQAGSTP	13			PTNGVGYQPYRVV	13
VKQLSSNFGAISS	13	DKNTQEVFAQVKQ	13			QDSLSSTASALGK	13
VPAQEKNFTTAPA	13	DLQELGKYEQYIK	13			QDVNCTEVPVAIH	13
VVNQNAQALNTLV	13	DPLQPELDSFKEE	13			QKFNGLTVLPPLL	13
YFKNHTSPDVDLG	13	DQLTPTWRVYSTG	13			QLPPAYTNSFTRG	13
YHLMSFPQSAPHG	13	DSKTQSLLIVNNA	13			QPRTFLLKYNENG	13
ADTTDAVRDPQTLE	14	DTTDAVRDPQTLE	13			QPTNGVGYQPYRV	13
AIGKIQDSLSSTAS	14	DVDLGDISGINAS	13			QSLLIVNNATNVV	13
ALTGIAVEQDKNTQ	14	DVVIGIVNNTVYD	13			RDIADTTDAVRDP	13
APAICHDGKAHFPR	14	EDLLFNKVTLADA	13			RVQPTESIVRFPN	13
ASALGKLQDVVNQN	14	ELDKYFKNHTSPD	13			SASFSTFKCYGVS	13
ASVVNIQKEIDRLN	14	ENQKLIANQFNSA	13			SEFRVYSSANNCT	13
DAGFIKQYGDCLGD	14	EPQIITTDNTFVS	13			SFTRGVYYPDKVF	13
DLEGKQGNFKNLRE	14	EQDKNTQEVFAQV	13			SLQTYVTQQLIRA	13
DPLSETKCTLKSFT	14	ESLIDLQELGKYE	13			SNLKPFERDISTE	13
DVNCTEVPVAIHAD	14	EVPVAIHADQLTP	13			SPTKLNDLCFTNV	13
EELDKYFKNHTSPD	14	FGTTLDSKTQSLL	13			SQILPDPSKPSKR	13
EHVNNSYECDIPIG	14	FNGLTGTGVLTES	13			SSTASALGKLQDV	13
EIDRLNEVAKNLNE	14	FNGLTVLPPLLTD	13			STFKCYGVSPTKL	13
ESEFRVYSSANNCT	14	FNSAIGKIQDSLS	13			SVLHSTQDLFLPF	13
EVRQIAPGQTGKIA	14	FRSSVLHSTQDLF	13			SVVNIQKEIDRLN	13
FPLQSYGFQPTNGV	14	GAALQIPFAMQMA	13			SYLTPGDSSSGWT	13
GGFNFSQILPDPSK	14	GFNFSQILPDPSK	13			TAGAAAYYVGYLQ	13
GKLQDVVNQNAQAL	14	GIVNNTVYDPLQP	13			TESNKKFLPFQQF	13
GYHLMSFPQSAPHG	14	GRDIADTTDAVRD	13			TFGAGAALQIPFA	13
IADYNYKLPDDFTG	14	GRLQSLQTYVTQQ	13			TGTGVLTESNKKF	13
IAPGQTGKIADYNY	14	GTTLDSKTQSLLI	13			TLADAGFIKQYGD	13
IAWNSNNLDSKVGG	14	GVGYQPYRVVVLS	13			TPGTNTSNQVAVL	13
IDLQELGKYEQYIK	14	GVVFLHVTYVPAQ	13			TPPIKDFGGFNFS	13
IEDLLFNKVTLADA	14	IANQFNSAIGKIQ	13			TPTWRVYSTGSNV	13
IITTDNTFVSGNCD	14	IDRLNEVAKNLNE	13			TSNFRVQPTESIV	13
IQDSLSSTASALGK	14	IGAEHVNNSYECD	13			TTEILPVSMTKTS	13
IRASANLAATKMSE	14	IGKIQDSLSSTAS	13			TTRTQLPPAYTNS	13
IRGDEVRQIAPGQT	14	ILPDPSKPSKRSF	13			TVEKGIYQTSNFR	13
KFLPFQQFGRDIAD	14	IQKEIDRLNEVAK	13			TWFHAIHVSGTNG	13
KFNGLTVLPPLLTD	14	IYSKHTPINLVRD	13			VAKNLNESLIDLQ	13
KHTPINLVRDLPQG	14	KPSKRSFIEDLLF	13			VDLPIGINITRFQ	13
KPFERDISTEIYQA	14	LGAENSVAYSNNS	13			VEQDKNTQEVFAQ	13
KQIYKTPPIKDFGG	14	LHVTYVPAQEKNF	13			VIRGDEVRQIAPG	13
KSNLKPFERDISTE	14	LKSFTVEKGIYQT	13			VITPGTNTSNQVA	13
KYFKNHTSPDVDLG	14	LPVSMTKTSVDCT	13			VKQIYKTPPIKDF	13
KYNENGTITDAVDC	14	LTGIAVEQDKNTQ	13			VKQLSSNFGAISS	13
LNEVAKNLNESLID	14	NAQALNTLVKQLS	13			VLHSTQDLFLPFF	13
LPDPSKPSKRSFIE	14	NDGVYFASTEKSN	13			VLTESNKKFLPFQ	13
NESLIDLQELGKYE	14	NGIGVTQNVLYEN	13			VLYENQKLIANQF	13
NFNGLTGTGVLTES	14	NLVRDLPQGFSAL	13			VLYNSASFSTFKC	13
NGTKRFDNPVLPFN	14	NNLDSKVGGNYNY	13			VNFNFNGLTGTGV	13
NHTSPDVDLGDISG	14	NQKLIANQFNSAI	13			VSSQCVNLTTRTQ	13
NIQKEIDRLNEVAK	14	NTVYDPLQPELDS	13			VSVITPGTNTSNQ	13
NNTVYDPLQPELDS	14	PLLTDEMIAQYTS	13			VVLSFELLHAPAT	13
NQVAVLYQDVNCTE	14	PTWRVYSTGSNVF	13			VYSTGSNVFQTRA	13
QAGSTPCNGVEGFN	14	QPRTFLLKYNENG	13			YGFQPTNGVGYQP	13
QDKNTQEVFAQVKQ	14	QQFGRDIADTTDA	13			YHLMSFPQSAPHG	13
QFNSAIGKIQDSLS	14	QRNFYEPQIITTD	13			YQAGSTPCNGVEG	13
QLNRALTGIAVEQD	14	QSLLIVNNATNVV	13			YVTQQLIRAAEIR	13
QPELDSFKEELDKY	14	SEFRVYSSANNCT	13			ADQLTPTWRVYSTG	14
QPTNGVGYQPYRVV	14	SFGGVSVITPGTN	13			AGAALQIPFAMQMA	14
QRNFYEPQIITTDN	14	SFKEELDKYFKNH	13			AIGKIQDSLSSTAS	14
RDISTEIYQAGSTP	14	SFVIRGDEVRQIA	13			AKNLNESLIDLQEL	14
RSYLTPGDSSSGWT	14	SGINASVVNIQKE	13			ALNTLVKQLSSNFG	14
SLGAENSVAYSNNS	14	SGNCDVVIGIVNN	13			ALTGIAVEQDKNTQ	14
TDAVDCALDPLSET	14	SGTNGTKRFDNPV	13			ANLAATKMSECVLG	14
TEVPVAIHADQLTP	14	SKVGGNYNYLYRL	13			APAICHDGKAHFPR	14
TPGDSSSGWTAGAA	14	SLQTYVTQQLIRA	13			ARDLICAQKFNGLT	14
TPTWRVYSTGSNVF	14	SNLKPFERDISTE	13			ASALGKLQDVVNQN	14
TYVPAQEKNFTTAP	14	SPTKLNDLCFTNV	13			ASVVNIQKEIDRLN	14
VFQTRAGCLIGAEH	14	SSGWTAGAAAYYV	13			AYSNNSIAIPTNFT	14
VFVSNGTHWFVTQR	14	SSTASALGKLQDV	13			AYTMSLGAENSVAY	14
VTLADAGFIKQYGD	14	SYLTPGDSSSGWT	13			DITPCSFGGVSVIT	14
VYFASTEKSNIIRG	14	TGKIADYNYKLPD	13			DLEGKQGNFKNLRE	14
YDPLQPELDSFKEE	14	TGRLQSLQTYVTQ	13			DLGDISGINASVVN	14
YEPQIITTDNTFVS	14	TGTGVLTESNKKF	13			DPLSETKCTLKSFT	14
YPDKVFRSSVLHST	14	TISVTTEILPVSM	13			DRLITGRLQSLQTY	14
YVSQPFLMDLEGKQ	14	TPGTNTSNQVAVL	13			DSFKEELDKYFKNH	14
DDSEPVLKGVKLHYT	15	TPPIKDFGGFNFS	13			DSKVGGNYNYLYRL	14
PCSFGGVSVITPGTN	15	TPTWRVYSTGSNV	13			DVNCTEVPVAIHAD	14
QDVNCTEVPVAIHAD	15	TQDLFLPFFSNVT	13			EIDRLNEVAKNLNE	14
QPTNGVGYQPYRVVV	15	TSNFRVQPTESIV	13			ESEFRVYSSANNCT	14
TPGDSSSGWTAGAAA	15	TTEILPVSMTKTS	13			ESNKKFLPFQQFGR	14
		TTRTQLPPAYTNS	13			EVQIDRLITGRLQS	14
		TVEKGIYQTSNFR	13			EYVSQPFLMDLEGK	14
		TWFHAIHVSGTNG	13			FAQVKQIYKTPPIK	14
		VASQSIIAYTMSL	13			FGTTLDSKTQSLLI	14
		VGYLQPRTFLLKY	13			FLHVTYVPAQEKNF	14
		VGYQPYRVVVLSF	13			FNGIGVTQNVLYEN	14
		VKQIYKTPPIKDF	13			FPLQSYGFQPTNGV	14
		VKQLSSNFGAISS	13			FRVQPTESIVRFPN	14
		VLTESNKKFLPFQ	13			GDIAARDLICAQKF	14
		VNCTEVPVAIHAD	13			GGFNFSQILPDPSK	14
		VPAQEKNFTTAPA	13			GGNYNYLYRLFRKS	14
		VSSQCVNLTTRTQ	13			GKLQDVVNQNAQAL	14
		VTQNVLYENQKLI	13			GTNTSNQVAVLYQD	14
		WNSNNLDSKVGGN	13			GVGYQPYRVVVLSF	14
		YFASTEKSNIIRG	13			GVLTESNKKFLPFQ	14
		YHLMSFPQSAPHG	13			GVTQNVLYENQKLI	14
		YNENGTITDAVDC	13			GVYYHKNNKSWMES	14
		AAAYYVGYLQPRTF	14			GYHLMSFPQSAPHG	14
		ADTTDAVRDPQTLE	14			HKNNKSWMESEFRV	14
		AGAALQIPFAMQMA	14			IADYNYKLPDDFTG	14
		AIGKIQDSLSSTAS	14			IAQYTSALLAGTIT	14
		AKNLNESLIDLQEL	14			IAWNSNNLDSKVGG	14
		APAICHDGKAHFPR	14			ICAQKFNGLTVLPP	14
		AQEKNFTTAPAICH	14			IDLQELGKYEQYIK	14
		ARDLICAQKFNGLT	14			IEDLLFNKVTLADA	14
		ASALGKLQDVVNQN	14			IGIVNNTVYDPLQP	14
		ASVVNIQKEIDRLN	14			IQDSLSSTASALGK	14
		DAGFIKQYGDCLGD	14			IRASANLAATKMSE	14
		DAVRDPQTLEILDI	14			IRGDEVRQIAPGQT	14
		DGYFKIYSKHTPIN	14			ISNCVADYSVLYNS	14
		DITPCSFGGVSVIT	14			ITPGTNTSNQVAVL	14
		DLEGKQGNFKNLRE	14			KFLPFQQFGRDIAD	14
		DPFLGVYYHKNNKS	14			KIYSKHTPINLVRD	14
		DPLSETKCTLKSFT	14			KPFERDISTEIYQA	14
		DPQTLEILDITPCS	14			KSNLKPFERDISTE	14
		DRLITGRLQSLQTY	14			KTPPIKDFGGFNFS	14
		DSFKEELDKYFKNH	14			KYNENGTITDAVDC	14
		DSFVIRGDEVRQIA	14			LHAPATVCGPKKST	14
		DSKVGGNYNYLYRL	14			LIANQFNSAIGKIQ	14
		DTTDAVRDPQTLEI	14			LKYNENGTITDAVD	14
		DVNCTEVPVAIHAD	14			LNEVAKNLNESLID	14
		DVVNQNAQALNTLV	14			LPDPSKPSKRSFIE	14
		EELDKYFKNHTSPD	14			LVDLPIGINITRFQ	14
		EIDRLNEVAKNLNE	14			LVKQLSSNFGAISS	14
		ENQKLIANQFNSAI	14			NESLIDLQELGKYE	14
		ENSVAYSNNSIAIP	14			NFNGLTGTGVLTES	14
		EQDKNTQEVFAQVK	14			NFTTAPAICHDGKA	14
		ESEFRVYSSANNCT	14			NGTHWFVTQRNFYE	14
		ESNKKFLPFQQFGR	14			NGVGYQPYRVVVLS	14
		EVQIDRLITGRLQS	14			NHTSPDVDLGDISG	14
		EVRQIAPGQTGKIA	14			NIQKEIDRLNEVAK	14
		FAQVKQIYKTPPIK	14			NITRFQTLLALHRS	14
		FGTTLDSKTQSLLI	14			NNATNVVIKVCEFQ	14
		FKNIDGYFKIYSKH	14			NRKRISNCVADYSV	14
		FKNLREFVFKNIDG	14			NSASFSTFKCYGVS	14
		FLHVTYVPAQEKNF	14			NSFTRGVYYPDKVF	14
		FPLQSYGFQPTNGV	14			NVLYENQKLIANQF	14
		FRVQPTESIVRFPN	14			PDVDLGDISGINAS	14
		GGFNFSQILPDPSK	14			PFLMDLEGKQGNFK	14
		GGNYNYLYRLFRKS	14			PIGINITRFQTLLA	14
		GKLQDVVNQNAQAL	14			PPAYTNSFTRGVYY	14
		GRDIADTTDAVRDP	14			PQSAPHGVVFLHVT	14
		GVEGFNCYFPLQSY	14			PREGVFVSNGTHWF	14
		GVGYQPYRVVVLSF	14			PTESIVRFPNITNL	14
		GVTQNVLYENQKLI	14			QAGSTPCNGVEGFN	14
		GYHLMSFPQSAPHG	14			QLNRALTGIAVEQD	14
		HGVVFLHVTYVPAQ	14			QPTNGVGYQPYRVV	14
		IADYNYKLPDDFTG	14			QTSNFRVQPTESIV	14
		IAPGQTGKIADYNY	14			RAAEIRASANLAAT	14
		IAVEQDKNTQEVFA	14			RDLPQGFSALEPLV	14
		IEDLLFNKVTLADA	14			RFDNPVLPFNDGVY	14
		IGIVNNTVYDPLQP	14			RLFRKSNLKPFERD	14
		IKDFGGFNFSQILP	14			RSYLTPGDSSSGWT	14
		IKQYGDCLGDIAAR	14			RVYSSANNCTFEYV	14
		ILPVSMTKTSVDCT	14			SFELLHAPATVCGP	14
		IQDSLSSTASALGK	14			SGINASVVNIQKEI	14
		IRASANLAATKMSE	14			SKHTPINLVRDLPQ	14
		IRGDEVRQIAPGQT	14			SLGAENSVAYSNNS	14
		ITPGTNTSNQVAVL	14			SNIIRGWIFGTTLD	14
		KPFERDISTEIYQA	14			SNNLDSKVGGNYNY	14
		LPDPSKPSKRSFIE	14			STEKSNIIRGWIFG	14
		LTTRTQLPPAYTNS	14			STGSNVFQTRAGCL	14
		NESLIDLQELGKYE	14			STQDLFLPFFSNVT	14
		NGTHWFVTQRNFYE	14			SVASQSIIAYTMSL	14
		NGTKRFDNPVLPFN	14			SYGFQPTNGVGYQP	14
		NHTSPDVDLGDISG	14			TDAVDCALDPLSET	14
		NIQKEIDRLNEVAK	14			TDEMIAQYTSALLA	14
		NNTVYDPLQPELDS	14			TEVPVAIHADQLTP	14
		NRKRISNCVADYSV	14			TFLLKYNENGTITD	14
		PPAYTNSFTRGVYY	14			TGRLQSLQTYVTQQ	14
		QPELDSFKEELDKY	14			TLKSFTVEKGIYQT	14
		QPTNGVGYQPYRVV	14			TNSFTRGVYYPDKV	14
		QRNFYEPQIITTDN	14			TPCNGVEGFNCYFP	14
		QTGKIADYNYKLPD	14			TPGDSSSGWTAGAA	14
		SFELLHAPATVCGP	14			TPTWRVYSTGSNVF	14
		SGINASVVNIQKEI	14			TQLPPAYTNSFTRG	14
		SLGAENSVAYSNNS	14			TQSLLIVNNATNVV	14
		SNNLDSKVGGNYNY	14			TSALLAGTITSGWT	14
		SRLDKVEAEVQIDR	14			TYVPAQEKNFTTAP	14
		STEKSNIIRGWIFG	14			VADYSVLYNSASFS	14
		STNLVKNKCVNFNF	14			VAKNLNESLIDLQE	14
		SVASQSIIAYTMSL	14			VKNKCVNFNFNGLT	14
		TDAVDCALDPLSET	14			VLLPLVSSQCVNLT	14
		TDEMIAQYTSALLA	14			VNNTVYDPLQPELD	14
		TEIYQAGSTPCNGV	14			VSGTNGTKRFDNPV	14
		TEVPVAIHADQLTP	14			VTLADAGFIKQYGD	14
		TGRLQSLQTYVTQQ	14			VYDPLQPELDSFKE	14
		TNTSNQVAVLYQDV	14			VYFASTEKSNIIRG	14
		TPGDSSSGWTAGAA	14			WFVTQRNFYEPQII	14
		TPTWRVYSTGSNVF	14			WTAGAAAYYVGYLQ	14
		TQEVFAQVKQIYKT	14			YDPLQPELDSFKEE	14
		TQSLLIVNNATNVV	14			YEPQIITTDNTFVS	14
		TYVPAQEKNFTTAP	14			YPDKVFRSSVLHST	14
		VADYSVLYNSASFS	14			YVSQPFLMDLEGKQ	14
		VKNKCVNFNFNGLT	14			AARDLICAQKFNGLT	15
		VSGTNGTKRFDNPV	14			ADAGFIKQYGDCLGD	15
		VTWFHAIHVSGTNG	14			AEHVNNSYECDIPIG	15
		VYAWNRKRISNCVA	14			AEVQIDRLITGRLQS	15
		VYFASTEKSNIIRG	14			AVLYQDVNCTEVPVA	15
		YDPLQPELDSFKEE	14			DFCGKGYHLMSFPQS	15
		YPDKVFRSSVLHST	14			DLGDISGINASVVNI	15
		AIGKIQDSLSSTASA	15			DSTECSNLLLQYGSF	15
		DFCGKGYHLMSFPQS	15			ECDIPIGAGICASYQ	15
		EILPVSMTKTSVDCT	15			EILPVSMTKTSVDCT	15
		ENGTITDAVDCALDP	15			ENGTITDAVDCALDP	15
		ERDISTEIYQAGSTP	15			FGGFNFSQILPDPSK	15
		GICASYQTQTNSPRR	15			FIEDLLFNKVTLADA	15
		IQDSLSSTASALGKL	15			FIKQYGDCLGDIAAR	15
		ITDAVDCALDPLSET	15			FTGCVIAWNSNNLDS	15
		LKYNENGTITDAVDC	15			GICASYQTQTNSPRR	15
		LPDDFTGCVIAWNSN	15			GLTVLPPLLTDEMIA	15
		PAQEKNFTTAPAICH	15			GVSPTKLNDLCFTNV	15
		PCSFGGVSVITPGTN	15			HSTQDLFLPFFSNVT	15
		PIGAGICASYQTQTN	15			ITDAVDCALDPLSET	15
		PLVSSQCVNLTTRTQ	15			KNFTTAPAICHDGKA	15
		SANLAATKMSECVLG	15			KSTNLVKNKCVNFNF	15
		SETKCTLKSFTVEKG	15			LDITPCSFGGVSVIT	15
		SFSTFKCYGVSPTKL	15			LDPLSETKCTLKSFT	15
		SKRVDFCGKGYHLMS	15			LGDIAARDLICAQKF	15
		SQCVNLTTRTQLPPA	15			LIDLQELGKYEQYIK	15
		STEIYQAGSTPCNGV	15			LKYNENGTITDAVDC	15
		TPGDSSSGWTAGAAA	15			LLHAPATVCGPKKST	15
		TRAGCLIGAEHVNNS	15			LNDILSRLDKVEAEV	15
						LNESLIDLQELGKYE	15
						LPDDFTGCVIAWNSN	15
						LPIGINITRFQTLLA	15
						MESEFRVYSSANNCT	15
						NGVEGFNCYFPLQSY	15
						NNSIAIPTNFTISVT	15
						NPVLPFNDGVYFAST	15
						NVFQTRAGCLIGAEH	15
						PAQEKNFTTAPAICH	15
						PCSFGGVSVITPGTN	15
						PIGAGICASYQTQTN	15
						PIKDFGGFNFSQILP	15
						PINLVRDLPQGFSAL	15
						PLSETKCTLKSFTVE	15
						PLVSSQCVNLTTRTQ	15
						PPAYTNSFTRGVYYP	15
						PQGFSALEPLVDLPI	15
						PSKPSKRSFIEDLLF	15
						PVAIHADQLTPTWRV	15
						QDVNCTEVPVAIHAD	15
						QIITTDNTFVSGNCD	15
						QKFNGLTVLPPLLTD	15
						RDPQTLEILDITPCS	15
						RISNCVADYSVLYNS	15
						RKSNLKPFERDISTE	15
						SANLAATKMSECVLG	15
						SETKCTLKSFTVEKG	15
						SNQVAVLYQDVNCTE	15
						SQCVNLTTRTQLPPA	15
						SQSIIAYTMSLGAEN	15
						SSANNCTFEYVSQPF	15
						STEIYQAGSTPCNGV	15
						STGSNVFQTRAGCLI	15
						STPCNGVEGFNCYFP	15
						TAPAICHDGKAHFPR	15
						TKLNDLCFTNVYADS	15
						TRAGCLIGAEHVNNS	15
						VAKNLNESLIDLQEL	15
						VLGQSKRVDFCGKGY	15
						VTYVPAQEKNFTTAP	15
						WNRKRISNCVADYSV	15
						YGDCLGDIAARDLIC	15
						YICGDSTECSNLLLQ	15
						YNYKLPDDFTGCVIA	15
						YQAGSTPCNGVEGFN	15
